# Supplementary figures and images for: Ultrafast nano-oscillators based on interlayer-bridged carbon nanoscrolls
Source: Springer Nature journal article supplement (doi:10.1186/1556-276x-6-470), 2011-07-25

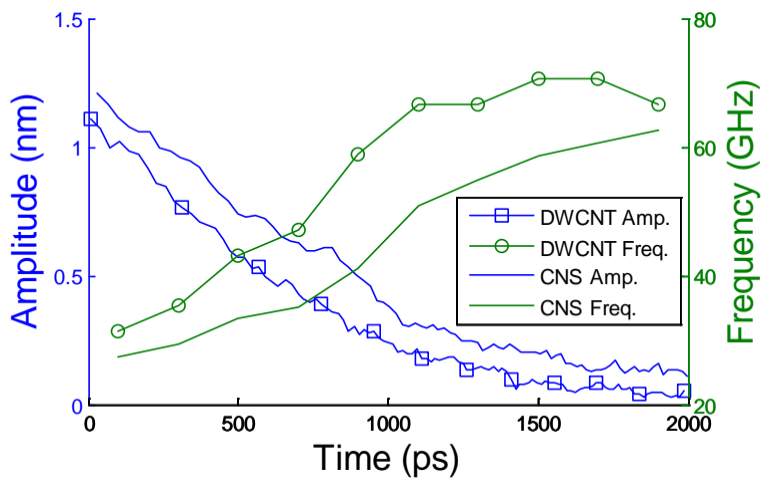

Supplement: 11671_2011_583_MOESM11_ESM.pdf [file 11671_2011_583_MOESM11_ESM.pdf]
